# Supplementary material
Source: Springer Nature journal article supplement (https://www.springermedizin.de/resource/supplementary/12935_2011_294_MOESM2_ESM.pdf/9540246)

**a**

### The *in vivo* exposure of mice

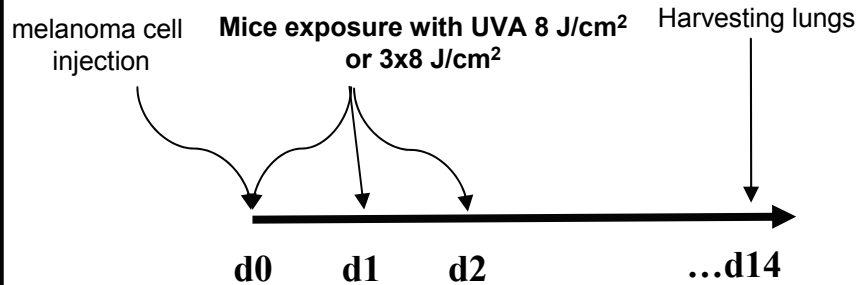**b**

### The *in vitro* exposure of melanoma cells

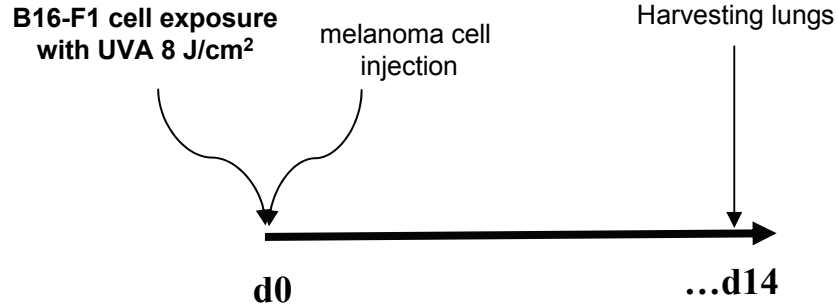

Supplement: MOESM2 [file 9540246]
